# Supplementary material for: Enhancing the performance of photoelectrochemical glucose sensorviathe electron cloud bridge of Au in SrTiO3/PDA electrodes
Source: Royal Society of Chemistry journal article supplement (doi:10.1039/d1ra00812a), 2021-01-01
Supplement: d1ra00812a1.pdf [file d1ra00812a1.pdf]

## Supporting Information

### **Enhancing the Performance of Photoelectrochemical Glucose Sensor via the Electron Cloud Bridge of Au in SrTiO<sub>3</sub>/PDA Electrodes**

Yadong Wang<sup>a</sup>, Jinxin Ma<sup>a</sup>, Nan Zhang<sup>a</sup>, Delun Chen<sup>a</sup>, Jinchun Tu<sup>a</sup>, Yang Cao<sup>a, c</sup>,  
Qiang Wu<sup>b, \*</sup>, Xiaolin Zhang<sup>c, \*</sup>, Wanjun Hao<sup>a, \*</sup>

<sup>a</sup> *Key Laboratory of Advanced Materials of Tropical Island Resources, State Key Laboratory of Marine Resource Utilization in South China Sea, Hainan University, Haikou 570228, P. R. China;*

<sup>b</sup> *School of Tropical Medicine and Laboratory Medicine, Key Laboratory of Emergency and Trauma of Ministry of Education, Research Unit of Island Emergency Medicine, Chinese Academy of Medical Sciences (No. 2019RU013), Hainan Medical University, Haikou, 571199, China;*

<sup>c</sup> *Key Laboratory of Child Cognition & Behavior Development of Hainan Province, Qiongtai Normal University, Haikou 571127, P. R. China*

Glucose oxidase (GOx) is specific catalysis for glucose, so the electrode can only work in the presence of glucose. Then, the performance toward selectivity of photoelectrochemistry (PEC) electrode is well-defined. The catalytic process of GOx and the photocurrent response can be described as follows [1]:

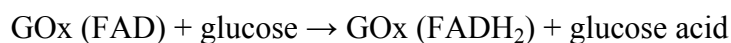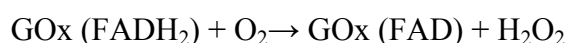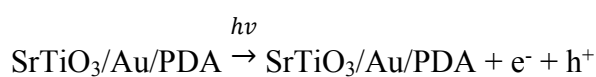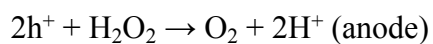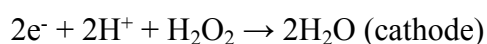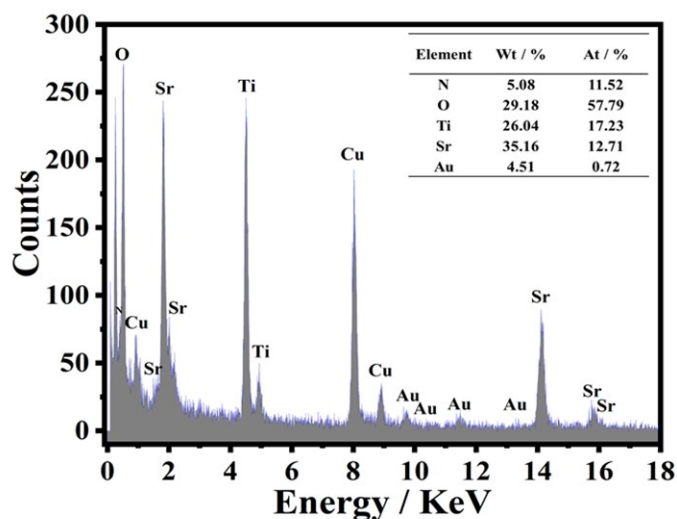

**Fig. S1.** EDX spectrum of the 3D hollowed out SrTiO<sub>3</sub>/Au/PDA nanoarray.

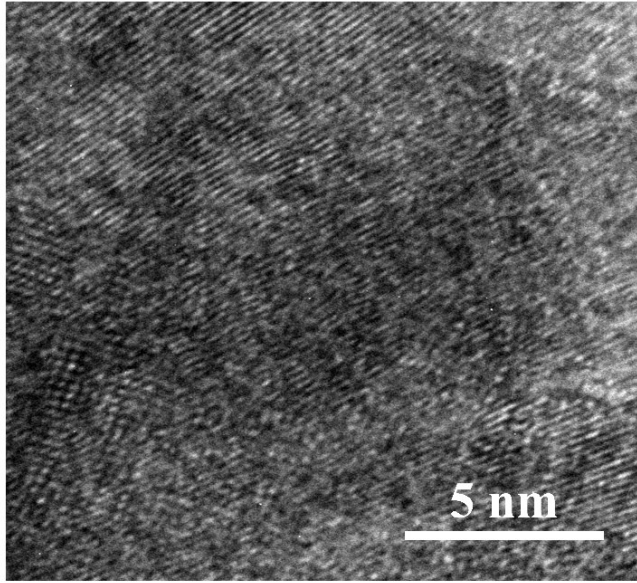

Fig. S2. HERTEM image of the 3D hollowed out SrTiO<sub>3</sub>/PDA nanoarray.

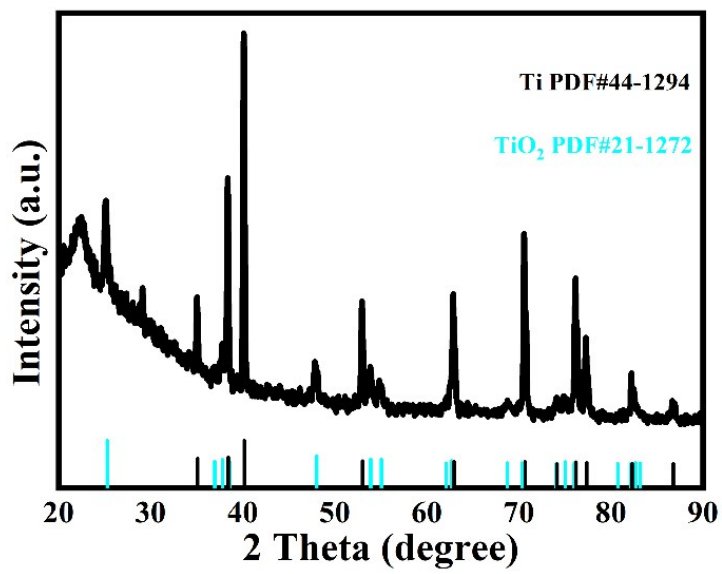

Fig. S3. XRD pattern of the precursor 3D hollowed out TiO<sub>2</sub>.

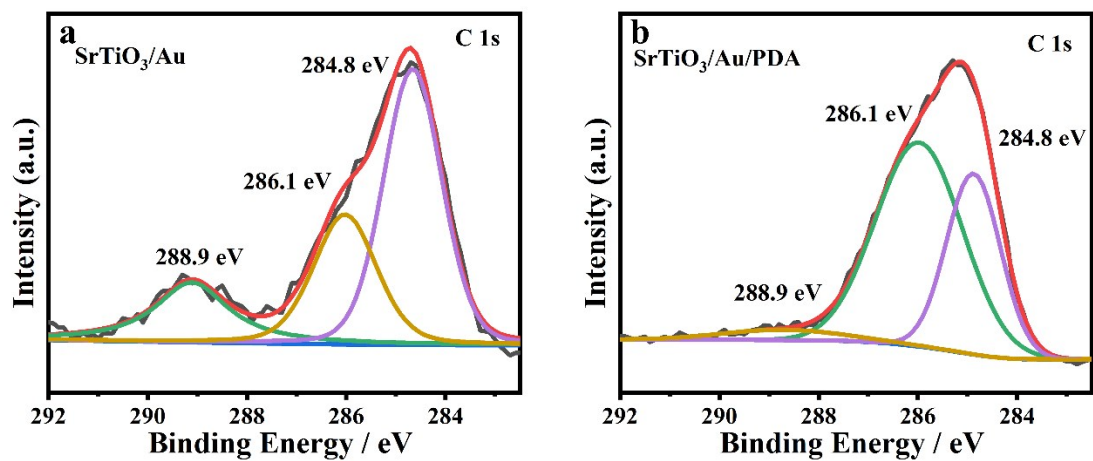

Fig. S4. The high-resolution spectra of C1s: (a) SrTiO<sub>3</sub>/Au; (b) SrTiO<sub>3</sub>/Au/PDA.

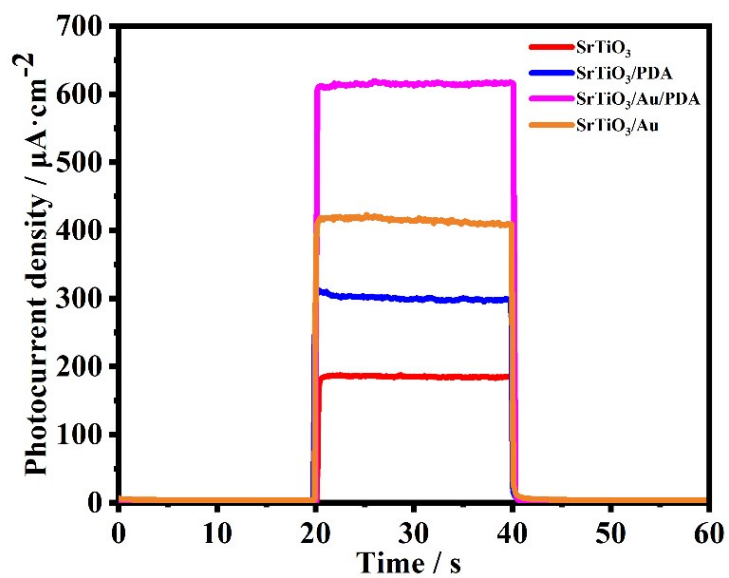

Fig. S5. Photocurrent response.

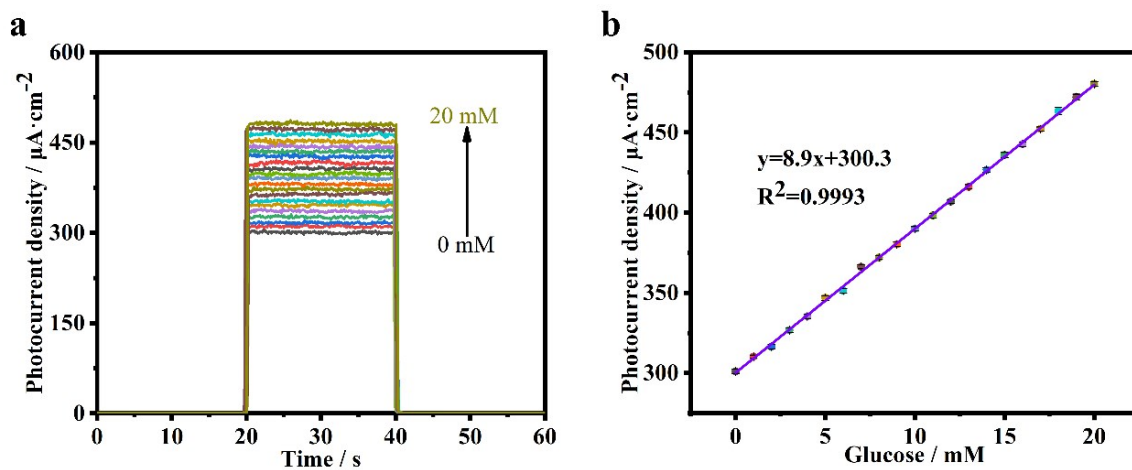

**Fig. S6.** The 3D hollowed out SrTiO<sub>3</sub>/PDA/GOx PEC sensor. (a) Photocurrent responses at different glucose concentrations (0–20 mM) in 0.1 M PBS (pH = 7.4). (b) Calibration curve of glucose concentration and photocurrent density.

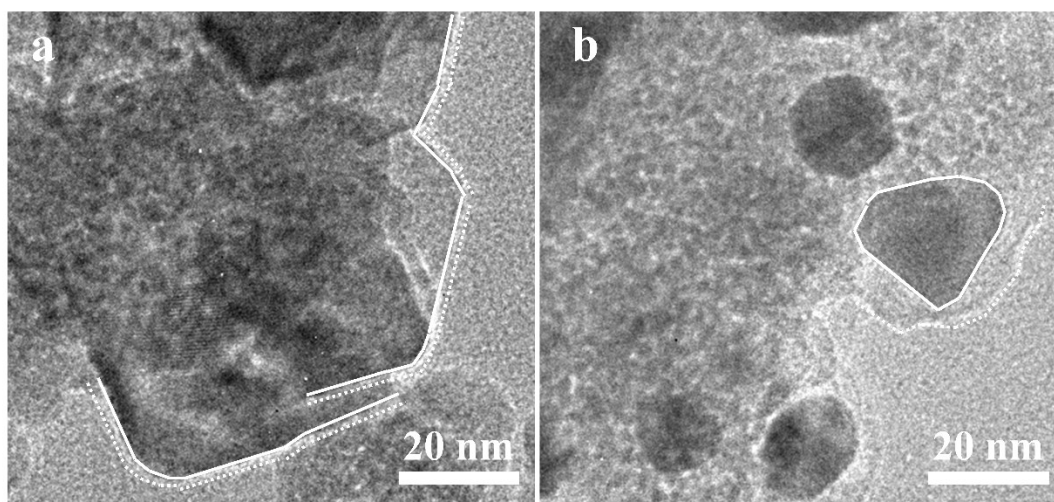

**Fig. S7.** (a) TEM of SrTiO<sub>3</sub>/Au/PDA. (b) TEM of SrTiO<sub>3</sub>/Au/PDA (excess PDA).

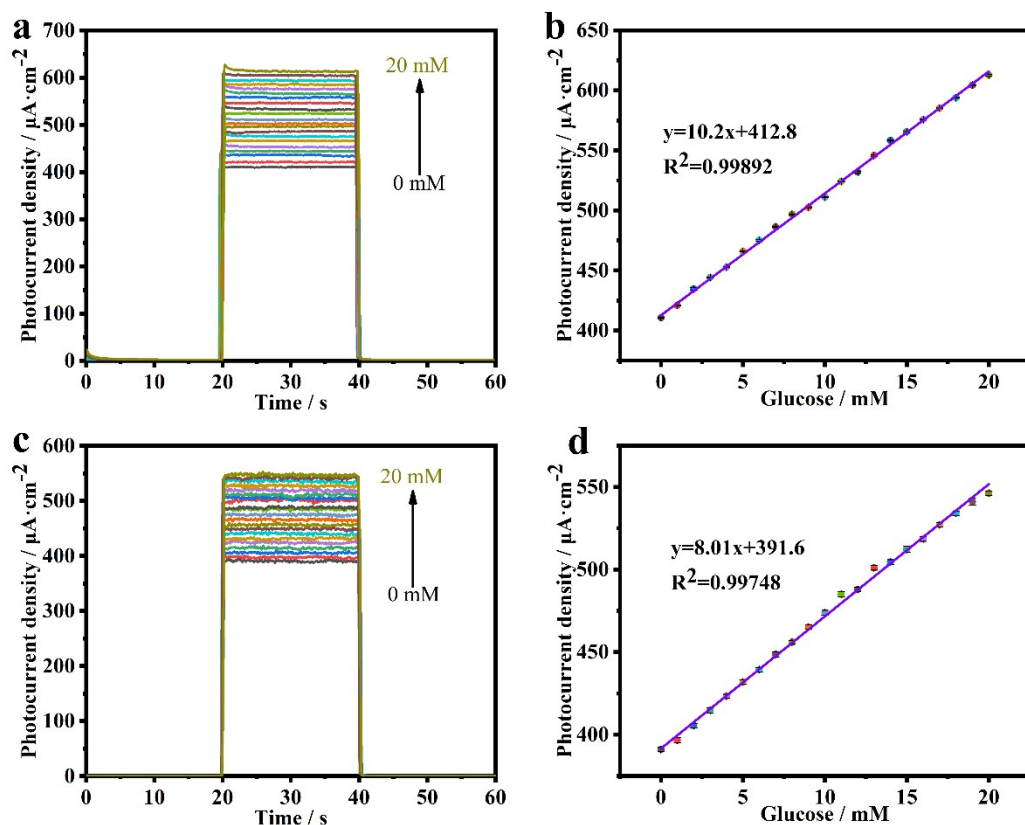

**Fig. S8.** The 3D hollowed out SrTiO<sub>3</sub>/Au/GOx PEC sensor. (a) Photocurrent responses at different glucose concentrations (0–20 mM) in 0.1 M PBS (pH = 7.4). (b) Calibration curve of glucose concentration and photocurrent density. The 3D hollowed out SrTiO<sub>3</sub>/Au/PDA (excess PDA)/GOx PEC sensor. (c) Photocurrent responses at different glucose concentrations (0–20 mM) in 0.1 M PBS (pH = 7.4). (d) Calibration curve of glucose concentration and photocurrent density.

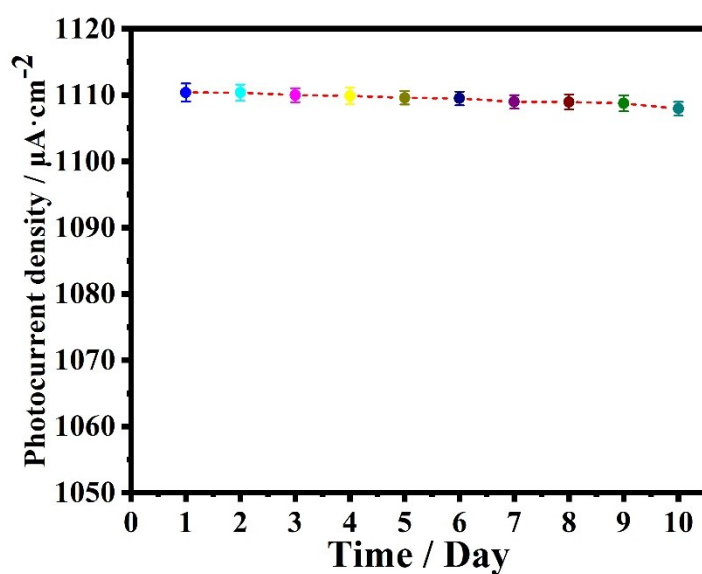

**Fig. S9.** Long-term (10 days) stability test of the hollowed out SrTiO<sub>3</sub>/Au/PDA/GOx PEC sensor in 0.1 M PBS (pH = 7.4) (presence of 20 mM glucose).

**Table S1.** The surface chemical states of C element and corresponding percentages in the samples.

| Peak                       | C-O or C-N (%) |
|----------------------------|----------------|
| SrTiO <sub>3</sub> /Au     | 28.57          |
| SrTiO <sub>3</sub> /Au/PDA | 62.60          |

**Table S2.** Determination of glucose concentration in human serum samples (n = 5).

| Sample | Known/mM | Discovered/mM | Added<br>glucose/mM | Total<br>discovered/mM | RSD/% | Recovery/% |
|--------|----------|---------------|---------------------|------------------------|-------|------------|
| 1      | 0.840    | 0.851         | 0.500               | 1.351                  | 3.200 | 100.831    |
| 2      | 6.080    | 6.133         | 0.500               | 6.633                  | 3.100 | 100.805    |
| 3      | 7.410    | 7.396         | 0.500               | 7.896                  | 2.900 | 99.823     |
| 4      | 11.370   | 11.190        | 0.500               | 11.690                 | 3.100 | 98.487     |
| 5      | 16.940   | 16.679        | 0.500               | 17.179                 | 3.200 | 98.507     |



## References

- [1] B.D. Yan, X.R. Zhao, D.L. Chen, Y. Cao, C.Z. Lv, J.C. Tu, X.H. Wang, Q. Wu, Enhanced photoelectrochemical biosensing performance for Au nanoparticle-polyaniline-TiO<sub>2</sub> heterojunction composites, *RSC Adv.* 10(72) (2020) 43985-43993.
